## GWAS on family history of Alzheimer's disease

Riccardo E. Marioni (PhD)<sup>1,2,3</sup>, Sarah E. Harris (PhD)<sup>1,3</sup>, Allan F. McRae (PhD)<sup>2</sup>, Qian Zhang (MSc)<sup>2</sup>, Saskia P. Hagenaars (PhD)<sup>3,4</sup>, W. David Hill (PhD)<sup>3,5</sup>, Gail Davies (PhD)<sup>3</sup>, Craig W. Ritchie (PhD)<sup>6</sup>, Catharine Gale (PhD)<sup>3,5</sup>, John M. Starr (PhD)<sup>3,7</sup>, Alison M. Goate (DPhil)<sup>8</sup>, David J. Porteous (PhD)<sup>1,3</sup>, Jian Yang (PhD)<sup>2,9</sup>, Kathryn L. Evans (PhD)<sup>1</sup>, Ian J. Deary (PhD)<sup>3,5</sup>, Naomi R. Wray (PhD)<sup>2,9</sup>, Peter M. Visscher (PhD)<sup>2,3,9</sup>

1. Centre for Genomic and Experimental Medicine, Institute of Genetics and Molecular Medicine, University of Edinburgh, Edinburgh, EH4 2XU, UK
2. Institute for Molecular Bioscience, University of Queensland, Brisbane, 4072, Australia
3. Centre for Cognitive Ageing and Cognitive Epidemiology, University of Edinburgh, Edinburgh, EH8 9JZ, UK
4. MRC Social, Genetic and Developmental Psychiatry Centre, Institute of Psychiatry, King's College London, London, SE5 8AF, UK
5. Department of Psychology, University of Edinburgh, Edinburgh, EH8 9JZ, UK
6. Centre for Dementia Prevention, Centre for Clinical Brain Sciences, University of Edinburgh, Edinburgh EH8 9YL, UK
7. Alzheimer Scotland Dementia Research Centre, University of Edinburgh, Edinburgh, EH8 9JZ, UK
8. Ronald M. Loeb Center for Alzheimer's disease, Departments of Neuroscience, Neurology and Genetics & Genomic Sciences, Icahn School of Medicine at Mount Sinai, New York, 10029-5674, USA
9. Queensland Brain Institute, University of Queensland, Brisbane, 4072, Australia

## **Correspondence**

Riccardo Marioni

**Email:** [riccardo.marioni@ed.ac.uk](mailto:riccardo.marioni@ed.ac.uk)

Centre for Genomic and Experimental Medicine

Institute of Genetics and Molecular Medicine

University of Edinburgh

Edinburgh

United Kingdom

EH4 2XU

**Phone:** +44 (0)131 651 8528

**Running Title:** GWAS of Alzheimer's disease

### **Author contributions:**

Conception and design of the work, drafting the manuscript: REM

Interpretation: REM, PMV, AFM, QY

Analysis: REM, QY

Critical revision of the manuscript: all authors

1 **Abstract**

2 Alzheimer's disease (AD) is a public health priority for the 21<sup>st</sup> century. Risk reduction  
3 currently revolves around lifestyle changes with much research trying to elucidate the  
4 biological underpinnings. Using self-report of parental history of Alzheimer's dementia for  
5 case ascertainment in a genome-wide association study of over 300,000 participants from UK  
6 Biobank (32,222 maternal cases, 16,613 paternal cases) and meta-analysing with published  
7 consortium data (n=74,046 with 25,580 cases across the discovery and replication analyses),  
8 six new AD-associated loci ( $P < 5 \times 10^{-8}$ ) are identified. Three contain genes relevant for AD  
9 and neurodegeneration: *ADAM10*, *ADAMTS4*, and *ACE*. Suggestive loci include drug targets  
10 such as *VKORCI* (warfarin dose) and *BZRAPI* (benzodiazepine receptor). We report  
11 evidence that association of SNPs and AD at the *PVR* gene is potentially mediated by both  
12 gene expression and DNA methylation in the prefrontal cortex. Our discovered loci may help  
13 to elucidate the biological mechanisms underlying AD and, given that many are existing drug  
14 targets for other diseases and disorders, warrant further exploration for potential precision  
15 medicine applications.

16

17

18

19

20

21

22

23

24

25

26 **Introduction**

27 The social and economic impact of Alzheimer's disease (AD) makes it a global priority for  
28 health and policy research. This is becoming increasingly important as life expectancies rise.  
29 Age is the biggest risk factor for AD, and lifestyle and routine health-check recommendations  
30 are in place to improve case ascertainment.<sup>1</sup>

31

32 The genetic epidemiology of late-onset Alzheimer's disease (LOAD) has advanced over the  
33 last decade,<sup>2</sup> with more than 20 independent loci associated with the disease in addition to  
34 *APOE*.<sup>3</sup> Presently, the largest meta-analytic genome-wide association study (GWAS) for  
35 LOAD employed a two-stage study design. First, 17,008 cases were compared to 37,154  
36 controls. 11,632 SNPs with  $P < 1 \times 10^{-3}$  from this meta-analysis were included in the second  
37 stage that compared 8,572 cases to 11,312 controls. A meta-analysis of the SNPs included in  
38 stages 1 and 2 was also performed.<sup>4</sup>

39

40 One difficulty and high net cost in traditional studies of AD is case ascertainment<sup>5</sup> — either  
41 directly for prevalent cases or indirectly through prospective cohort studies for incident cases  
42 — given that dementia diagnosis is currently exclusively based on cognitive and functional  
43 assessment with no testing for underlying biological determinants of the clinical syndrome  
44 being required. A recent GWAS study on the UK Biobank cohort used information from  
45 family history (parent or first-degree relative with AD or dementia) as a proxy-phenotype for  
46 the participants.<sup>6</sup> When meta-analysed with the GWAS summary data highlighted above,<sup>4</sup>  
47 four new loci were identified.

48

49 The UK Biobank proxy-phenotype AD question, which is used here, does not incorporate  
50 biomarker data that are required for a clinical diagnosis. However, it is easy to administer at

51 scale and we show that it has a near unit genetic correlation with the AD results from the  
52 LOAD meta-analysis<sup>4</sup>, where many of the samples also lacked a confirmed diagnosis by  
53 biomarker levels and autopsy.

54

55 In the present study, we related proxy-phenotype information on dementia (i.e., reporting a  
56 parent with Alzheimer’s dementia or dementia) to genetic data from 385,869 individuals  
57 from the UK Biobank cohort to identify new AD-associated loci. GWA studies were  
58 conducted separately for maternal and paternal AD due to a near two-fold difference in  
59 disease prevalence – 9.6% and 5.5%, respectively. The summary statistics from these models  
60 were meta-analysed with those from the largest publicly-available case-control study.<sup>4</sup>  
61 Sensitivity analyses showed that an overlap of controls in the maternal and paternal GWAS  
62 did not bias the results. Genetic correlation analysis showed the self-reported measure of  
63 parental AD to be an accurate proxy for clinical diagnosis, validating the global meta-  
64 analysis. In addition, we tested for causal evidence of our SNP – AD associations being  
65 mediated through gene expression and DNA methylation in the prefrontal cortex.

66

## 67 **Subjects and Methods**

### 68 *UK Biobank Cohort*

69 UK Biobank data<sup>7</sup> (<http://www.ukbiobank.ac.uk>) were collected on over 500,000 individuals  
70 aged between 37 and 73 years from across Great Britain (England, Wales, and Scotland) at  
71 the study baseline (2006-2010), including health, cognitive, and genetic data.

72

73 The Research Ethics Committee (REC) granted ethical approval for the study – reference  
74 11/NW/0382 – and the current analysis was conducted under data application 10279.

75

76 *Genotyping*

77 Genotyping details for the UK Biobank cohort have been reported previously.<sup>8,9</sup> Briefly, two  
78 custom genotyping arrays were utilised with 49,950 participants typed using the UK BiLEVE  
79 Axiom Array and 438,427 participants typed using the UK Biobank Axiom Array.<sup>8,9</sup> The  
80 released, genotyped data contained 805,426 markers on 488,377 individuals. Imputed  
81 genotypes were supplied with the UK Biobank data with the HRC used as the imputation  
82 reference panel.<sup>8</sup>

83

84 Downstream quality control steps conducted for the current analysis included removing (1)  
85 those with non-British ancestry based on both self-report and a principal components  
86 analysis, (2) outliers based on heterozygosity and missingness, (3) individuals with sex  
87 chromosome configurations that were neither XX nor XY, (4) individuals whose reported sex  
88 did not match inferred sex from their genetic data, and (5) individuals with more than 10  
89 putative third degree relatives from the kinship table. This left a sample of 408,095  
90 individuals. To remove the possibility of double contributions from sibs, whose parents will  
91 have the same AD status, we first considered a list of all participants with a relative  
92 (N=131,790). A genetic relationship matrix was built for these individuals using GCTA-  
93 GRM<sup>10</sup> and a relationship threshold of 0.4 was applied to exclude one person from each sib-  
94 pair while retaining e.g., half-sibs and cousins and more distantly related individuals. After  
95 removing the excluded sib, the sample size was 385,869. Quality control thresholds applied  
96 to the GWAS included: minor allele frequency > 0.01, imputation quality score > 0.1, and  
97 restriction to HRC-imputed SNPs, leaving a total of 7,795,606 SNPs for the GWAS.

98

99 *Phenotypes*

100 Family history of Alzheimer’s disease was ascertained via self-report. Participants were  
101 asked “Has/did your father ever suffer from Alzheimer’s disease/dementia?” and “Has/did  
102 your mother ever suffer from Alzheimer’s disease/dementia?” Self-report data from the initial  
103 assessment visit (2006-2010), the first repeat assessment visit (2012-2013), and the imaging  
104 visit (2014+) were aggregated with exclusions made for participants whose parents were:  
105 aged under 60 years; dead before reaching age 60 years; without age information. After  
106 merging with the genetic data, this left 32,222 cases of maternal AD with 302,756 controls,  
107 and 16,613 cases of paternal AD with 285,083 controls. Given the expected difference in  
108 disease prevalence due to sex differences in longevity – AD prevalence was double in  
109 mothers compared to fathers – GWA studies were performed separately for maternal and  
110 paternal AD.

111

#### 112 *Genome-Wide Association Study*

113 The GWA studies were conducted using BGENIE.<sup>8</sup> The outcome variable was the residuals  
114 from a linear regression model of maternal or paternal AD on age of parent at death or at time  
115 of the offspring’s self-report, assessment centre, genotype batch, array, and 40 genetic  
116 principal components. The predictor variable was the autosomal SNP and an additive model  
117 was considered.

118

119 The GWAS linear regression coefficients were converted to odds ratios using observed  
120 sample prevalences of 0.096 and 0.055 for maternal and paternal AD, respectively,<sup>11</sup> before  
121 the log-odds were multiplied by two, in this way the effect size are reported on the same scale  
122 as a traditional case-control design.<sup>6</sup> Standard errors for the log-odds were then calculated  
123 based on the adjusted OR and the P-value from the initial GWAS (**Supplementary Note 1**).

124 The ORs and standard errors were then carried forward to a weighted meta-analysis in

125 METAL<sup>12</sup> with the Stage 2 summary output from the IGAP study<sup>4</sup> and the Stage 1 output for  
126 the SNPs that did not contribute to Stage 2. Linkage Disequilibrium Score (LDSC) regression  
127 was used to estimate the genetic correlation between the maternal and paternal AD GWAS  
128 results and to test for residual confounding in the meta-analysis by examining the LDSC  
129 intercept.<sup>13,14</sup>

130

131 The number of independent loci from the meta-analysis was determined by using the default  
132 settings in FUMA.<sup>15</sup> Independent lead SNPs had  $P < 5 \times 10^{-8}$  and were independent at  $r^2 < 0.6$ .  
133 Within this pool of independent SNPs, lead SNPs were defined as those in LD at  $r^2 < 0.1$ . Loci  
134 were defined by combining lead SNPs within a 250kb window and all SNPs in LD of at least  
135  $r^2 = 0.6$  with one of the independent SNPs. The 1000 genomes phase 3 data<sup>16</sup> were used to  
136 map LD. This analysis was then re-run using an index SNP threshold of  $P < 1 \times 10^{-5}$  to identify  
137 suggestive loci. A gene-based analysis was carried out on all SNP output using the MAGMA  
138 software<sup>17</sup> and assuming a constant sample size for all genes. A Bonferroni-adjusted P-value  
139 of  $0.05/18,251 = 2.7 \times 10^{-6}$  was used to identify significant genes.

140

#### 141 *Summary-data based Mendelian Randomization*

142 To test for pleiotropic associations between AD and gene expression/DNA methylation in the  
143 brain, summary-data based Mendelian Randomization (SMR) was performed.<sup>18</sup> GWAS  
144 summary output from the meta-analysis of UK Biobank and IGAP (sample size specified as  
145  $385,869 + 74,046 = 459,915$ ) were included along with expression QTL summary output  
146 from the Common Mind Consortium, which contains data on >600 dorsolateral prefrontal  
147 cortex samples, and DNA methylation QTL summary on 258 prefrontal cortex samples (age  
148 > 13).<sup>19</sup> The reference genotypes were based on the Health and Retirement Study, imputed to  
149 the 1000 Genomes phase 1 reference panel. SNP exclusions included: imputation score < 0.3,



150 Hardy-Weinberg P-value  $<1 \times 10^{-6}$ , and a minor allele frequency  $<0.01$ . Related individuals,  
151 based on a genomic-relationship matrix cut-off of 0.05, were removed. Two sets of eQTL  
152 summary data were considered (1) after adjustment for diagnosis, institution, sex, age of  
153 death, post-mortem interval, RNA integrity number (RIN),  $RIN^2$ , and clustered library batch  
154 (2) with additional adjustments for 20 surrogate variables. Five ancestry vectors were  
155 included as covariates in the eQTL analyses. Further details are available at:  
156 <https://www.synapse.org/#!Synapse:syn4622659>. Default parameters for the SMR analysis  
157 were used and cis eQTLs/methQTLs were considered for analysis. Bonferroni-corrected P-  
158 value thresholds were applied ( $P < 0.05/2,011 = 2.5 \times 10^{-5}$  for eQTL dataset 1,  
159  $P < 0.05/4,380 = 1.1 \times 10^{-5}$  for eQTL dataset 2, and  $P < 0.05/54624 = 9.2 \times 10^{-7}$  for methQTL  
160 dataset).

161

## 162 **Results**

### 163 *UK Biobank GWAS*

164 There were 32,222 cases of maternal AD (302,756 controls, prevalence of 9.6%) and 16,613  
165 cases of paternal AD (285,083 controls, prevalence of 5.5%) in UK Biobank. Linear  
166 regression GWA studies of maternal and paternal AD identified five genome-wide-significant  
167 loci, located in the *CRI*, *BINI*, *CLU*, *PICALM*, and *APOE* gene regions (**Supplementary**  
168 **Figures 1 and 2**). All are established AD loci.<sup>4</sup> The genetic correlation between maternal and  
169 paternal AD was not significantly different from unity ( $r_g = 0.61$ , SE 0.42), although the SE is  
170 large. Both traits had a high genetic correlation with the case-control summary output from  
171 the International Genomics of Alzheimer's Disease Consortium (IGAP):  $r_g$  with maternal and  
172 paternal AD was 1.07 (SE 0.28) and 0.79 (0.35), respectively, both not significantly different  
173 from unity but with large SEs.

174

175 Prior to meta-analysing the UK Biobank parental summary statistics with the IGAP output,  
176 we investigated the influence of overlapping proxy-controls in UK Biobank. The p-values  
177 from a single GWAS of parental AD status (0, 1, or 2 parents with AD) correlated 0.99 with  
178 those from a meta-analysis of separate maternal AD and paternal AD; the regression of  $-\log_{10}$   
179 P-values on each other gave an intercept of 0 and a slope of 1. A meta-analysis of the  
180 summary statistics from the maternal and paternal results is therefore equivalent to the  
181 analysis of parental AD status. The linear regression effect sizes from the GWAS were  
182 converted to odds ratios prior to the meta-analysis.<sup>11</sup>

183

#### 184 *Meta-Analysis*

185 The meta-analysis of the maternal and paternal AD history in UK Biobank with the IGAP  
186 data identified 77 lead SNPs and 243 independent significant SNPs with  $P < 5 \times 10^{-8}$  from 24  
187 genomic risk loci. The majority (n=49) of the lead SNPs were located in the gene-dense  
188 *APOE/TOMM40* locus on chromosome 19 (**Figure 1** and **Supplementary Table 1**; GWAS  
189 summary statistics are available for the 7,795,605 meta-analysed SNPs in **Supplementary**  
190 **Table 2 [available online upon publication]**). The LDSC regression intercept term from the  
191 meta-analysis summary output was 1.027 (SE 0.01), indicating a polygenic signal  
192 independent from residual confounding.

193

#### 194 *Novel genome-wide significant loci*

195 Of the 24 significant risk loci, six were novel (**Table 1**), three of which spanned genes and  
196 gene regions with strong biological links to AD and neurodegeneration: rs4575098  
197 (*ADAMTS4*, chr1); rs442495 (*ADAM10*, chr15); and rs6504163 (*ACE*, chr17). The other  
198 three loci had lead SNPs located in: a gene desert on chr4 (rs6448453) that is ~400kb from  
199 the *CLNK* gene (**Supplementary Figure 3**); in *CCDC6* on chr10 (rs1171812); and in a

200 poorly annotated region on chr16 (rs12444183), proximal to the *PLCG2* gene  
201 (**Supplementary Figure 4**). When phosphorylated, CLNK interacts with PLCG2 and is  
202 needed for PLCG2-mediated signalling in BLNK-deficient DT40 cells  
203 ([http://www.uniprot.org/uniprot/Q7Z7G1#ptm\\_processing](http://www.uniprot.org/uniprot/Q7Z7G1#ptm_processing)). PLCG2 is a transmembrane  
204 signalling enzyme important for correct functioning of the immune system.<sup>20</sup> A rare variant in  
205 *PLCG2* has been found to be protective against AD.<sup>21</sup>

206

### 207 *Replication of IGAP loci*

208 Fifteen of the 21 previously-reported SNPs<sup>4</sup> associated with AD were genome-wide  
209 significant ( $P < 5 \times 10^{-8}$ ) in the current meta-analysis, with four other SNPs (rs2718058,  
210 rs10838725, rs17125944, and rs10498633) having  $P < 1 \times 10^{-5}$  (**Supplementary Table 3**). The  
211 *MEF2C* variant, rs190982, had a meta-analysis p-value of  $5.4 \times 10^{-3}$  and rs8093731 (a *DSG2*  
212 variant), which was genome-wide significant in Stage 1 but not stage 2 of IGAP, had a meta-  
213 analysis p-value of 0.18. There was complete sign-concordance between UK Biobank and  
214 IGAP for all 21 SNPs (**Supplementary Table 3**). The odds ratios between the maternal and  
215 paternal analysis for the top 21 IGAP SNPs were correlated  $r = 0.91$ . Both also correlated  
216 highly with the effect sizes reported in the IGAP analysis ( $r = 0.85$  and  $0.80$ , respectively).

217

### 218 *Suggestive loci*

219 There were 170 lead SNPs from 79 loci in the analysis considering variants with  $P < 1 \times 10^{-5}$   
220 (**Supplementary Table 4**). These loci harboured SNPs that have been associated at  $P < 5 \times 10^{-8}$   
221 with traits (**Supplementary Table 5**) such as: warfarin dose, triglyceride levels, BMI,  
222 Parkinson's disease, and blood pressure (suggestive locus #64, chr16: 30,820,866-  
223 31,171,174);<sup>22-26</sup> lupus and HDL cholesterol (suggestive locus #29, chr7: 50,258,234-  
224 50,318,938);<sup>27,28</sup> cholesterol, heart disease, and brain white matter hyperintensity burden

225 (suggestive locus #9, chr2: 203,639,395-204,196,618);<sup>29-31</sup> asthma and allergy (suggestive  
226 locus #2, chr1: 90,302,027-90,306,216);<sup>32</sup> and blood pressure (suggestive locus #68, chr17:  
227 47,301,268-47,476,235).<sup>33</sup> A further suggestive locus (#69, chr17: 56,398,006-56,450,524)  
228 contained a SNP within the benzodiazepine receptor (*BZRAP1*) gene that was genome-wide  
229 associated with AD in a trans-ethnic study.<sup>34</sup>

230

### 231 *Gene-based analysis*

232 102 genes were significant at a Bonferroni threshold of  $P < 2.7 \times 10^{-6}$  (**Supplementary Table**  
233 **6**). Gene Ontology analysis showed significant enrichment for the regulation of amyloid-beta  
234 clearance, negative regulation of amyloid-beta formation, very-low-density lipoprotein  
235 particle clearance, phospholipid efflux, plasma lipoprotein particle assembly, and negative  
236 regulation of endocytosis (**Supplementary Table 7**).

237

### 238 *Summary-data-based Mendelian Randomization (SMR)*

239 Pleiotropic associations between AD and gene expression in the brain were tested using  
240 SMR.<sup>18</sup> GWAS summary data for AD were taken from the UK Biobank and IGAP meta-  
241 analysis. eQTL summary data came from the Common Mind Consortium (n>600 dorsolateral  
242 prefrontal cortex samples: dataset 1 adjusted for age at death, sex, and institution; dataset 2  
243 made additional adjustments for 20 surrogate variables). MethQTL data came from 258  
244 dorsolateral prefrontal cortex samples (participants aged 13 years and older – adjustments  
245 were made for the first 5 genetic MDS components and first 11 methylation PCs).<sup>19</sup> We  
246 found evidence of brain expression and DNA methylation associated with AD in the *PVR*  
247 gene (part of the *APOE/TOMM40* cluster on chromosome 19) in both eQTL models and also  
248 in the methQTL model (**Supplementary Tables 8-10**). However, the HEIDI p-values were  
249 <0.05 for all three analyses, indicating that the associations were unlikely to be driven by a

250 single causal variant affecting both expression/methylation and AD. Furthermore, different  
251 top QTL SNPs in *PVR* were identified in each of the three analyses: rs11540084, rs2301275,  
252 and rs10410915. The eQTL SNPs were in high LD in European samples<sup>35,36</sup> ( $R^2 = 0.99$ ) but  
253 neither was in high LD with the methQTL ( $R^2 = 0.46$  and  $0.45$ , respectively). All three SNPs  
254 are in very low LD with the *APOE* allele defining SNPs, rs7412 (max  $R^2 = 0.002$ ) and  
255 rs429358 (max  $R^2 = 0.003$ ).

256

## 257 **Discussion**

258 Using recently-established proxy-phenotype methods for case ascertainment, we identified  
259 six new genome-wide significant loci for Alzheimer's disease, three of which contain genes  
260 that have strong biological links to the disease and three others not previously linked to the  
261 disorder.

262

263 *ACE* determines levels of angiotensin II, which has trophic actions within the brain and  
264 contributes to the regulation of cerebral blood flow.<sup>37</sup> Previous meta-analyses of candidate  
265 gene studies identified variants within *ACE* to be associated with AD, though not at genome-  
266 wide significance.<sup>38,39</sup> *ACE* variants have also been linked to atrophy of the hippocampus and  
267 amygdala,<sup>40</sup> and CSF-*ACE* protein levels correlate with CSF tau and phosphorylated tau.<sup>41,42</sup>

268

269 Members of the ADAM family were identified in two of the novel loci. *ADAM10* is involved  
270 in the cleavage of amyloid beta precursor protein,<sup>43</sup> which is involved in the deposition of  
271 amyloid beta, a major neurological hallmark of AD. *ADAM10* has been proposed as potential  
272 therapeutic agent in AD therapy.<sup>43,44</sup> Rare variants in *ADAM10* have also been linked to  
273 LOAD.<sup>45</sup> *ADAMTS4* has been proposed as a regulator of synaptic plasticity during the  
274 development and ageing of the central nervous system.<sup>46,47</sup>

275

276 The suggestive loci ( $P < 1 \times 10^{-5}$ ) harboured variants in genes associated with cardiometabolic  
277 health, immunological response, and neuropathology (white matter hyperintensities and  
278 Parkinson's disease), many of which are phenotypically linked to AD. Other suggestive loci  
279 included a *VKORCI* variant, rs9923231, whose T allele was associated with an increased risk  
280 of AD ( $P = 2.3 \times 10^{-7}$ , independent SNP of locus #64), and is strongly associated with the need  
281 for a reduced dose of warfarin anticoagulation.<sup>24,48</sup> The rs2526378 variant in *BZRAP1* gene  
282 ( $P = 1.2 \times 10^{-7}$ , lead SNP of suggestive locus #69) was part of a cluster with rs2632516, which  
283 was a genome-wide significant SNP in a trans-ethnic study of AD.<sup>34</sup> *BZRAP1* is involved in  
284 benzodiazepine receptor binding. Use of benzodiazepines has been associated with risk of  
285 dementia,<sup>49</sup> particularly for users of long half-life medication<sup>50</sup> thus providing a biological  
286 basis for what many considered to be an observation based on reverse causality.

287

288 An integrative analysis of eQTL and methQTL with the GWAS summary data identified one  
289 previously identified AD gene, *PVR*, as having its gene expression and methylation levels  
290 associated with AD. The most parsimonious explanation of these results is the existence of  
291 multiple causal variants, some affecting AD and others affecting expression or methylation.  
292 *PVR* is a poliovirus receptor in the *APOE/TOMM40* cluster on chromosome 19 that has been  
293 hypothesised to influence the risk of AD through susceptibility to viral infections.<sup>51</sup> A  
294 previous SMR analysis of AD and LDL-cholesterol identified evidence of 16 pleiotropic  
295 SNPs, 12 of which were located in the *APOE* region.<sup>52</sup>

296

297 The main strength of the study is the proxy phenotype approach, which resulted in over  
298 48,000 proxy-cases, which has roughly equivalent power to a study of 12,000 observed  
299 cases.<sup>6</sup> However, the question used to determine parental AD status may have resulted in

300 some responders being unable to discriminate Alzheimer's disease and dementia from other  
301 dementia sub-types, which have different presentations and genetic architectures.<sup>53,54</sup> This  
302 method of proxy-case ascertainment may have influenced the loci uncovered. Parental  
303 dementia status is partly dependent on longevity, with age being the biggest risk factor for  
304 AD. We partially controlled for this by excluding participants whose parents were younger  
305 than or died prior to reaching the age of 60 years when AD incidence is extremely low. The  
306 misclassification of case status via incorrect informant reporting will have reduced the power  
307 to detect true effects. This, along with a possible winner's curse effect for the IGAP study,  
308 might explain the reduction in the meta-analytic odds ratios compared to those previously  
309 reported.<sup>4</sup>

310

311 The therapeutics field for disease modification in AD is now benefitting from more accurate,  
312 though as yet incomplete, understanding of the cascade of disease processes and phenotypic  
313 expression in preclinical and prodromal Alzheimer's dementia populations.<sup>55</sup> A prerequisite  
314 for precision medicine is the ability to identify sub-populations of a clinical condition who  
315 share a common, relevant and targetable disease mechanism.<sup>56</sup> Stratification of samples for  
316 clinical trials currently being undertaken in AD rely almost exclusively on identification of  
317 intra-cerebral amyloid and therein testing of anti-amyloid therapies. Our work highlights the  
318 possibilities of basing clinical stratification on other genetic markers, in addition to *APOE*,  
319 where associated disease processes are known to be relevant, and for which pharmacological  
320 interventions are already available.

321

322 *Conclusion*

323 We identified three new AD-associated loci that have known and putative biological  
324 processes associated with Alzheimer's disease. Suggestive ( $P < 1 \times 10^{-5}$ ) associations included  
325 loci linked to common diseases and health measures that are comorbid with, or commonly  
326 used to predict risk of AD. These findings help to elucidate the biological mechanisms  
327 underlying AD and, given that some (*VKORC1*, *ACE*, *BZRAP1*) are existing drug targets for  
328 other diseases and disorders, warrant further exploration for potential precision medicine and  
329 clinical trial applications.

330

331 Supplementary information is available at MP's website.

332

### 333 **Acknowledgements**

334 Riccardo Marioni is supported by Alzheimer's Research UK major project grant number  
335 ARUK-PG2017B-10. The research was conducted, using the UK Biobank Resource, in The  
336 University of Edinburgh Centre for Cognitive Ageing and Cognitive Epidemiology  
337 (CCACE), part of the cross-council Lifelong Health and Wellbeing Initiative  
338 (MR/K026992/1); funding from the Biotechnology and Biological Sciences Research  
339 Council (BBSRC) and Medical Research Council (MRC) is gratefully acknowledged.  
340 CCACE supports Ian Deary, with some additional support from Dementias Platform UK  
341 (MR/L015382/1). This report represents independent research part-funded by the National  
342 Institute for Health Research (NIHR) Biomedical Research Centre at South London and  
343 Maudsley NHS Foundation Trust and King's College London. The University of Queensland  
344 authors acknowledge funding from the Australian National Health and Medical Research  
345 Council (grants 1113400, 1078901, 1078037) and the Charles & Sylvia Viertel Fellowship  
346 (JY). David Hill is supported by a grant from Age UK (Disconnected Mind Project). Alison  
347 Goate is supported by the National Institutes of Health (AG049508, AG052411) and the JPB



348 Foundation. Alison Goate is on the scientific advisory board for Denali Therapeutics and  
349 has served as a consultant for AbbVie and Cognition Therapeutics.

350

351 The funders had no role in study design, data collection and analysis, decision to publish, or  
352 preparation of the manuscript.

353

### 354 **Conflict of Interest**

355 There are no financial conflicts of interest for any of the authors.

356

### 357 **References**

- 358 1 Livingston G, Sommerlad A, Orgeta V, Costafreda SG, Huntley J, Ames D *et al.* Dementia  
359 prevention, intervention, and care. *Lancet Lond Engl* 2017. doi:10.1016/S0140-6736(17)31363-6.
- 360 2 Huang Y, Mucke L. Alzheimer Mechanisms and Therapeutic Strategies. *Cell* 2012; **148**: 1204–  
361 1222.
- 362 3 Van Cauwenberghe C, Van Broeckhoven C, Sleegers K. The genetic landscape of Alzheimer  
363 disease: clinical implications and perspectives. *Genet Med Off J Am Coll Med Genet* 2016; **18**:  
364 421–430.
- 365 4 Lambert JC, Ibrahim-Verbaas CA, Harold D, Naj AC, Sims R, Bellenguez C *et al.* Meta-analysis of  
366 74,046 individuals identifies 11 new susceptibility loci for Alzheimer’s disease. *Nat Genet* 2013;  
367 **45**: 1452–1458.
- 368 5 Sibbett RA, Russ TC, Deary IJ, Starr JM. Dementia ascertainment using existing data in UK  
369 longitudinal and cohort studies: a systematic review of methodology. *BMC Psychiatry* 2017; **17**:  
370 239.
- 371 6 Liu JZ, Erlich Y, Pickrell JK. Case-control association mapping by proxy using family history of  
372 disease. *Nat Genet* 2017; **49**: 325–331.
- 373 7 Sudlow C, Gallacher J, Allen N, Beral V, Burton P, Danesh J *et al.* UK biobank: an open access  
374 resource for identifying the causes of a wide range of complex diseases of middle and old age.  
375 *PLoS Med* 2015; **12**: e1001779.
- 376 8 Bycroft C, Freeman C, Petkova D, Band G, Elliott LT, Sharp K *et al.* Genome-wide genetic data on  
377 ~500,000 UK Biobank participants. *BioRxiv* doi:<https://doi.org/10.1101/166298>.
- 378 9 Wain LV, Shrine N, Miller S, Jackson VE, Ntalla I, Soler Artigas M *et al.* Novel insights into the  
379 genetics of smoking behaviour, lung function, and chronic obstructive pulmonary disease (UK  
380 BiLEVE): a genetic association study in UK Biobank. *Lancet Respir Med* 2015; **3**: 769–781.

- 381 10 Yang J, Benyamin B, McEvoy BP, Gordon S, Henders AK, Nyholt DR *et al.* Common SNPs explain a  
382 large proportion of the heritability for human height. *Nat Genet* 2010; **42**: 565–569.
- 383 11 Lloyd-Jones LR, Robinson MR, Yang J, Visscher PM. Transformation of summary statistics from  
384 linear mixed model association on all-or-none traits to odds ratio. *Genetics*.
- 385 12 Willer CJ, Li Y, Abecasis GR. METAL: fast and efficient meta-analysis of genomewide association  
386 scans. *Bioinforma Oxf Engl* 2010; **26**: 2190–2191.
- 387 13 Bulik-Sullivan B, Finucane HK, Anttila V, Gusev A, Day FR, Loh P-R *et al.* An atlas of genetic  
388 correlations across human diseases and traits. *Nat Genet* 2015; **47**: 1236–1241.
- 389 14 Bulik-Sullivan BK, Loh P-R, Finucane HK, Ripke S, Yang J, Schizophrenia Working Group of the  
390 Psychiatric Genomics Consortium *et al.* LD Score regression distinguishes confounding from  
391 polygenicity in genome-wide association studies. *Nat Genet* 2015; **47**: 291–295.
- 392 15 Watanabe K, Taskesen E, Bochoven A, Posthuma D. Functional mapping and annotation of  
393 genetic associations with FUMA. *Nat Commun* 2017; **8**: 1826.
- 394 16 1000 Genomes Project Consortium, Abecasis GR, Altshuler D, Auton A, Brooks LD, Durbin RM *et al.*  
395 A map of human genome variation from population-scale sequencing. *Nature* 2010; **467**:  
396 1061–1073.
- 397 17 de Leeuw CA, Mooij JM, Heskes T, Posthuma D. MAGMA: generalized gene-set analysis of GWAS  
398 data. *PLoS Comput Biol* 2015; **11**: e1004219.
- 399 18 Zhu Z, Zhang F, Hu H, Bakshi A, Robinson MR, Powell JE *et al.* Integration of summary data from  
400 GWAS and eQTL studies predicts complex trait gene targets. *Nat Genet* 2016; **48**: 481–487.
- 401 19 Jaffe AE, Gao Y, Deep-Soboslay A, Tao R, Hyde TM, Weinberger DR *et al.* Mapping DNA  
402 methylation across development, genotype and schizophrenia in the human frontal cortex. *Nat*  
403 *Neurosci* 2016; **19**: 40–47.
- 404 20 Lehman HK. Autoimmunity and Immune Dysregulation in Primary Immune Deficiency Disorders.  
405 *Curr Allergy Asthma Rep* 2015; **15**: 53.
- 406 21 Sims R, van der Lee SJ, Naj AC, Bellenguez C, Badarinarayan N, Jakobsdottir J *et al.* Rare coding  
407 variants in PLAG2, ABI3, and TREM2 implicate microglial-mediated innate immunity in  
408 Alzheimer’s disease. *Nat Genet* 2017; **49**: 1373–1384.
- 409 22 Warren HR, Evangelou E, Cabrera CP, Gao H, Ren M, Mifsud B *et al.* Genome-wide association  
410 analysis identifies novel blood pressure loci and offers biological insights into cardiovascular risk.  
411 *Nat Genet* 2017; **49**: 403–415.
- 412 23 Locke AE, Kahali B, Berndt SI, Justice AE, Pers TH, Day FR *et al.* Genetic studies of body mass  
413 index yield new insights for obesity biology. *Nature* 2015; **518**: 197–206.
- 414 24 Takeuchi F, McGinnis R, Bourgeois S, Barnes C, Eriksson N, Soranzo N *et al.* A genome-wide  
415 association study confirms VKORC1, CYP2C9, and CYP4F2 as principal genetic determinants of  
416 warfarin dose. *PLoS Genet* 2009; **5**: e1000433.
- 417 25 Teslovich TM, Musunuru K, Smith AV, Edmondson AC, Stylianou IM, Koseki M *et al.* Biological,  
418 clinical and population relevance of 95 loci for blood lipids. *Nature* 2010; **466**: 707–713.

- 419 26 Nalls MA, Pankratz N, Lill CM, Do CB, Hernandez DG, Saad M *et al.* Large-scale meta-analysis of  
420 genome-wide association data identifies six new risk loci for Parkinson's disease. *Nat Genet*  
421 2014; **46**: 989–993.
- 422 27 Willer CJ, Schmidt EM, Sengupta S, Peloso GM, Gustafsson S, Kanoni S *et al.* Discovery and  
423 refinement of loci associated with lipid levels. *Nat Genet* 2013; **45**: 1274–1283.
- 424 28 Bentham J, Morris DL, Graham DSC, Pinder CL, Tomblinson P, Behrens TW *et al.* Genetic  
425 association analyses implicate aberrant regulation of innate and adaptive immunity genes in the  
426 pathogenesis of systemic lupus erythematosus. *Nat Genet* 2015; **47**: 1457–1464.
- 427 29 Dichgans M, Malik R, König IR, Rosand J, Clarke R, Gretarsdottir S *et al.* Shared genetic  
428 susceptibility to ischemic stroke and coronary artery disease: a genome-wide analysis of  
429 common variants. *Stroke* 2014; **45**: 24–36.
- 430 30 Surakka I, Horikoshi M, Mägi R, Sarin A-P, Mahajan A, Lagou V *et al.* The impact of low-frequency  
431 and rare variants on lipid levels. *Nat Genet* 2015; **47**: 589–597.
- 432 31 Verhaaren BFJ, Debette S, Bis JC, Smith JA, Ikram MK, Adams HH *et al.* Multiethnic genome-wide  
433 association study of cerebral white matter hyperintensities on MRI. *Circ Cardiovasc Genet* 2015;  
434 **8**: 398–409.
- 435 32 Pickrell JK, Berisa T, Liu JZ, Séguérel L, Tung JY, Hinds DA. Detection and interpretation of shared  
436 genetic influences on 42 human traits. *Nat Genet* 2016; **48**: 709–717.
- 437 33 Newton-Cheh C, Johnson T, Gateva V, Tobin MD, Bochud M, Coin L *et al.* Genome-wide  
438 association study identifies eight loci associated with blood pressure. *Nat Genet* 2009; **41**: 666–  
439 676.
- 440 34 Jun GR, Chung J, Mez J, Barber R, Beecham GW, Bennett DA *et al.* Transethnic genome-wide  
441 scan identifies novel Alzheimer's disease loci. *Alzheimers Dement J Alzheimers Assoc* 2017; **13**:  
442 727–738.
- 443 35 Machiela MJ, Chanock SJ. LDlink: a web-based application for exploring population-specific  
444 haplotype structure and linking correlated alleles of possible functional variants. *Bioinforma Oxf*  
445 *Engl* 2015; **31**: 3555–3557.
- 446 36 Machiela MJ, Chanock SJ. LDassoc: an online tool for interactively exploring genome-wide  
447 association study results and prioritizing variants for functional investigation. *Bioinforma Oxf*  
448 *Engl* 2017. doi:10.1093/bioinformatics/btx561.
- 449 37 Starr JM, Whalley LJ. *ACE inhibitors: central actions*. Raven Press: New York, 1994.
- 450 38 Elkins JS, Douglas VC, Johnston SC. Alzheimer disease risk and genetic variation in ACE: a meta-  
451 analysis. *Neurology* 2004; **62**: 363–368.
- 452 39 Lehmann DJ, Cortina-Borja M, Warden DR, Smith AD, Sleegers K, Prince JA *et al.* Large meta-  
453 analysis establishes the ACE insertion-deletion polymorphism as a marker of Alzheimer's  
454 disease. *Am J Epidemiol* 2005; **162**: 305–317.
- 455 40 Sleegers K, den Heijer T, van Dijk EJ, Hofman A, Bertoli-Avella AM, Koudstaal PJ *et al.* ACE gene is  
456 associated with Alzheimer's disease and atrophy of hippocampus and amygdala. *Neurobiol*  
457 *Aging* 2005; **26**: 1153–1159.

- 458 41 Jochemsen HM, Teunissen CE, Ashby EL, van der Flier WM, Jones RE, Geerlings MI *et al.* The  
459 association of angiotensin-converting enzyme with biomarkers for Alzheimer's disease.  
460 *Alzheimers Res Ther* 2014; **6**: 27.
- 461 42 Kauwe JSK, Bailey MH, Ridge PG, Perry R, Wadsworth ME, Hoyt KL *et al.* Genome-wide  
462 association study of CSF levels of 59 alzheimer's disease candidate proteins: significant  
463 associations with proteins involved in amyloid processing and inflammation. *PLoS Genet* 2014;  
464 **10**: e1004758.
- 465 43 Suh J, Choi SH, Romano DM, Gannon MA, Lesinski AN, Kim DY *et al.* ADAM10 missense  
466 mutations potentiate  $\beta$ -amyloid accumulation by impairing prodomain chaperone function.  
467 *Neuron* 2013; **80**: 385–401.
- 468 44 Yuan X-Z, Sun S, Tan C-C, Yu J-T, Tan L. The Role of ADAM10 in Alzheimer's Disease. *J Alzheimers*  
469 *Dis JAD* 2017; **58**: 303–322.
- 470 45 Kim M, Suh J, Romano D, Truong MH, Mullin K, Hooli B *et al.* Potential late-onset Alzheimer's  
471 disease-associated mutations in the ADAM10 gene attenuate  $\alpha$ -secretase activity. *Hum*  
472 *Mol Genet* 2009; **18**: 3987–3996.
- 473 46 Krstic D, Rodriguez M, Knuesel I. Regulated proteolytic processing of Reelin through interplay of  
474 tissue plasminogen activator (tPA), ADAMTS-4, ADAMTS-5, and their modulators. *PLoS One* 2012;  
475 **7**: e47793.
- 476 47 Lemarchant S, Pomeschik Y, Kidin I, Kärkkäinen V, Valonen P, Lehtonen S *et al.* ADAMTS-4  
477 promotes neurodegeneration in a mouse model of amyotrophic lateral sclerosis. *Mol*  
478 *Neurodegener* 2016; **11**: 10.
- 479 48 Wadelius M, Chen LY, Downes K, Ghori J, Hunt S, Eriksson N *et al.* Common VKORC1 and GGCCX  
480 polymorphisms associated with warfarin dose. *Pharmacogenomics J* 2005; **5**: 262–270.
- 481 49 Starr JM, Whalley LJ. Drug-induced dementia. Incidence, management and prevention. *Drug Saf*  
482 1994; **11**: 310–317.
- 483 50 Shash D, Kurth T, Bertrand M, Dufouil C, Barberger-Gateau P, Berr C *et al.* Benzodiazepine,  
484 psychotropic medication, and dementia: A population-based cohort study. *Alzheimers Dement J*  
485 *Alzheimers Assoc* 2016; **12**: 604–613.
- 486 51 Porcellini E, Carbone I, Ianni M, Licastro F. Alzheimer's disease gene signature says: beware of  
487 brain viral infections. *Immun Ageing* 2010; **7**: 16.
- 488 52 Zhu Z, Zheng Z, Zhang F, Wu Y, Trzaskowski M, Maier R *et al.* Causal associations between risk  
489 factors and common diseases inferred from GWAS summary data. *bioRxiv* 2017; : 168674.
- 490 53 Ferrari R, Wang Y, Vandrovцова J, Guelfi S, Witeolar A, Karch CM *et al.* Genetic architecture of  
491 sporadic frontotemporal dementia and overlap with Alzheimer's and Parkinson's diseases. *J*  
492 *Neurol Neurosurg Psychiatry* 2017; **88**: 152–164.
- 493 54 Ikram MA, Bersano A, Manso-Calderón R, Jia J-P, Schmidt H, Middleton L *et al.* Genetics of  
494 vascular dementia - review from the ICVD working group. *BMC Med* 2017; **15**: 48.

495 55 Ritchie CW, Molinuevo JL, Truyen L, Satlin A, Van der Geyten S, Lovestone S *et al.* Development  
496 of interventions for the secondary prevention of Alzheimer's dementia: the European  
497 Prevention of Alzheimer's Dementia (EPAD) project. *Lancet Psychiatry* 2016; **3**: 179–186.

498 56 Hampel H, O'Bryant SE, Castrillo JI, Ritchie C, Rojkova K, Broich K *et al.* PRECISION MEDICINE -  
499 The Golden Gate for Detection, Treatment and Prevention of Alzheimer's Disease. *J Prev*  
500 *Alzheimers Dis* 2016; **3**: 243–259.

501

**Table 1.** Novel SNPs ( $P < 5 \times 10^{-8}$ ) from the meta-analysis of UK Biobank parental history of Alzheimer's disease with results from IGAP (Lambert et al., 2013).

| Chr | SNP        | BP        | A1 | A2 | Freq A1 | Direction* | Odds ratio (95% CI) | Meta P  | SNPs in |                          |
|-----|------------|-----------|----|----|---------|------------|---------------------|---------|---------|--------------------------|
|     |            |           |    |    |         |            |                     |         | cluster | Cluster Range            |
| 1   | rs4575098  | 161155392 | A  | G  | 0.23    | +++?       | 1.05 (1.03 - 1.06)  | 2.7E-08 | 15      | chr1:161097241-161156033 |
| 4   | rs6448453  | 11026028  | A  | G  | 0.26    | +++?       | 1.05 (1.03 - 1.07)  | 1.2E-09 | 19      | chr4:11026028-11040406   |
| 10  | rs1171812  | 61655297  | T  | C  | 0.52    | ---?       | 0.96 (0.94 - 0.97)  | 3.5E-08 | 12      | chr10:61631416-61710540  |
| 15  | rs442495   | 59022615  | T  | C  | 0.66    | ++?+       | 1.06 (1.04 - 1.07)  | 1.4E-12 | 93      | chr15:58875398-59130927  |
| 16  | rs12444183 | 81773209  | A  | G  | 0.39    | --?        | 0.96 (0.94 - 0.97)  | 5.3E-09 | 5       | chr16:81773003-81773816  |
| 17  | rs6504163  | 61545779  | T  | C  | 0.63    | +++?       | 1.05 (1.03 - 1.07)  | 2.8E-09 | 43      | chr17:61545779-61578207  |

\* UK Biobank maternal AD, UK Biobank paternal AD, IGAP stage 1, IGAP stage 2

## Figures

**Figure 1.** Manhattan Plot for the meta-analysis of maternal and paternal Alzheimer's disease in UK Biobank and the results from Stage 1 and Stage 2 of IGAP [**Lambert et al. 2013**]. The red line indicates  $P=5 \times 10^{-8}$  and the blue line indicates  $P=1 \times 10^{-5}$ . P-values truncated at  $1 \times 10^{-20}$

## Supplemental Data Description

There are 4 supplementary figures and 10 supplementary tables

**Figure S1.** Manhattan Plot for the genome-wide association analysis of maternal Alzheimer's disease in UK Biobank. The red line indicates  $P=5 \times 10^{-8}$  and the blue line indicates  $P=1 \times 10^{-5}$ . P-values truncated at  $1 \times 10^{-20}$

**Figure S2.** Manhattan Plot for the genome-wide association analysis of paternal Alzheimer's disease in UK Biobank. The red line indicates  $P=5 \times 10^{-8}$  and the blue line indicates  $P=1 \times 10^{-5}$ . P-values truncated at  $1 \times 10^{-20}$

**Figure S3.** Plot of genome-wide significant locus #5

**Figure S4.** Plot of genome-wide significant locus #18

## Supplementary Tables (Excel file)

**Table S1.** Independent genome-wide significant AD loci from the meta-analysis of UK Biobank and IGAP summary statistics

**Table S2.** Summary output from the GWAS meta-analysis of maternal and paternal AD in UK Biobank with IGAP

**Table S3.** Lookup of genome-wide significant loci identified in Lambert et al.

**Table S4.** Independent genome-wide significant ( $P < 5 \times 10^{-8}$ ) and suggestive AD loci ( $P < 1 \times 10^{-5}$ ) from the meta-analysis of UK Biobank and IGAP summary statistics

**Table S5.** GWAS catalog output for SNPs at loci with a lead SNP at  $P < 1 \times 10^{-5}$

**Table S6.** MAGMA gene-based associations for the UK Biobank and IGAP meta-analysis summary results



**Table S7.** Gene Ontology enrichment analysis for the genome-wide significant genes

**Table S8.** SMR analysis of AD GWAS summary output and brain expression QTL summary output (adjusted for diagnosis, institution, sex, age of death, post-mortem interval, RNA integrity number (RIN), RIN<sup>2</sup>, and clustered library batch)

**Table S9.** SMR analysis of AD GWAS summary output and brain expression QTL summary output (adjustment for diagnosis, institution, sex, age of death, post-mortem interval, RNA integrity number (RIN), RIN<sup>2</sup>, clustered library batch, and 20 surrogate variables)

**Table S10.** SMR analysis of AD GWAS summary output and brain methylation QTL summary output (adjusted for 5 genetic MDS components and 11 methylation PCs)

# UK Biobank + IGAP

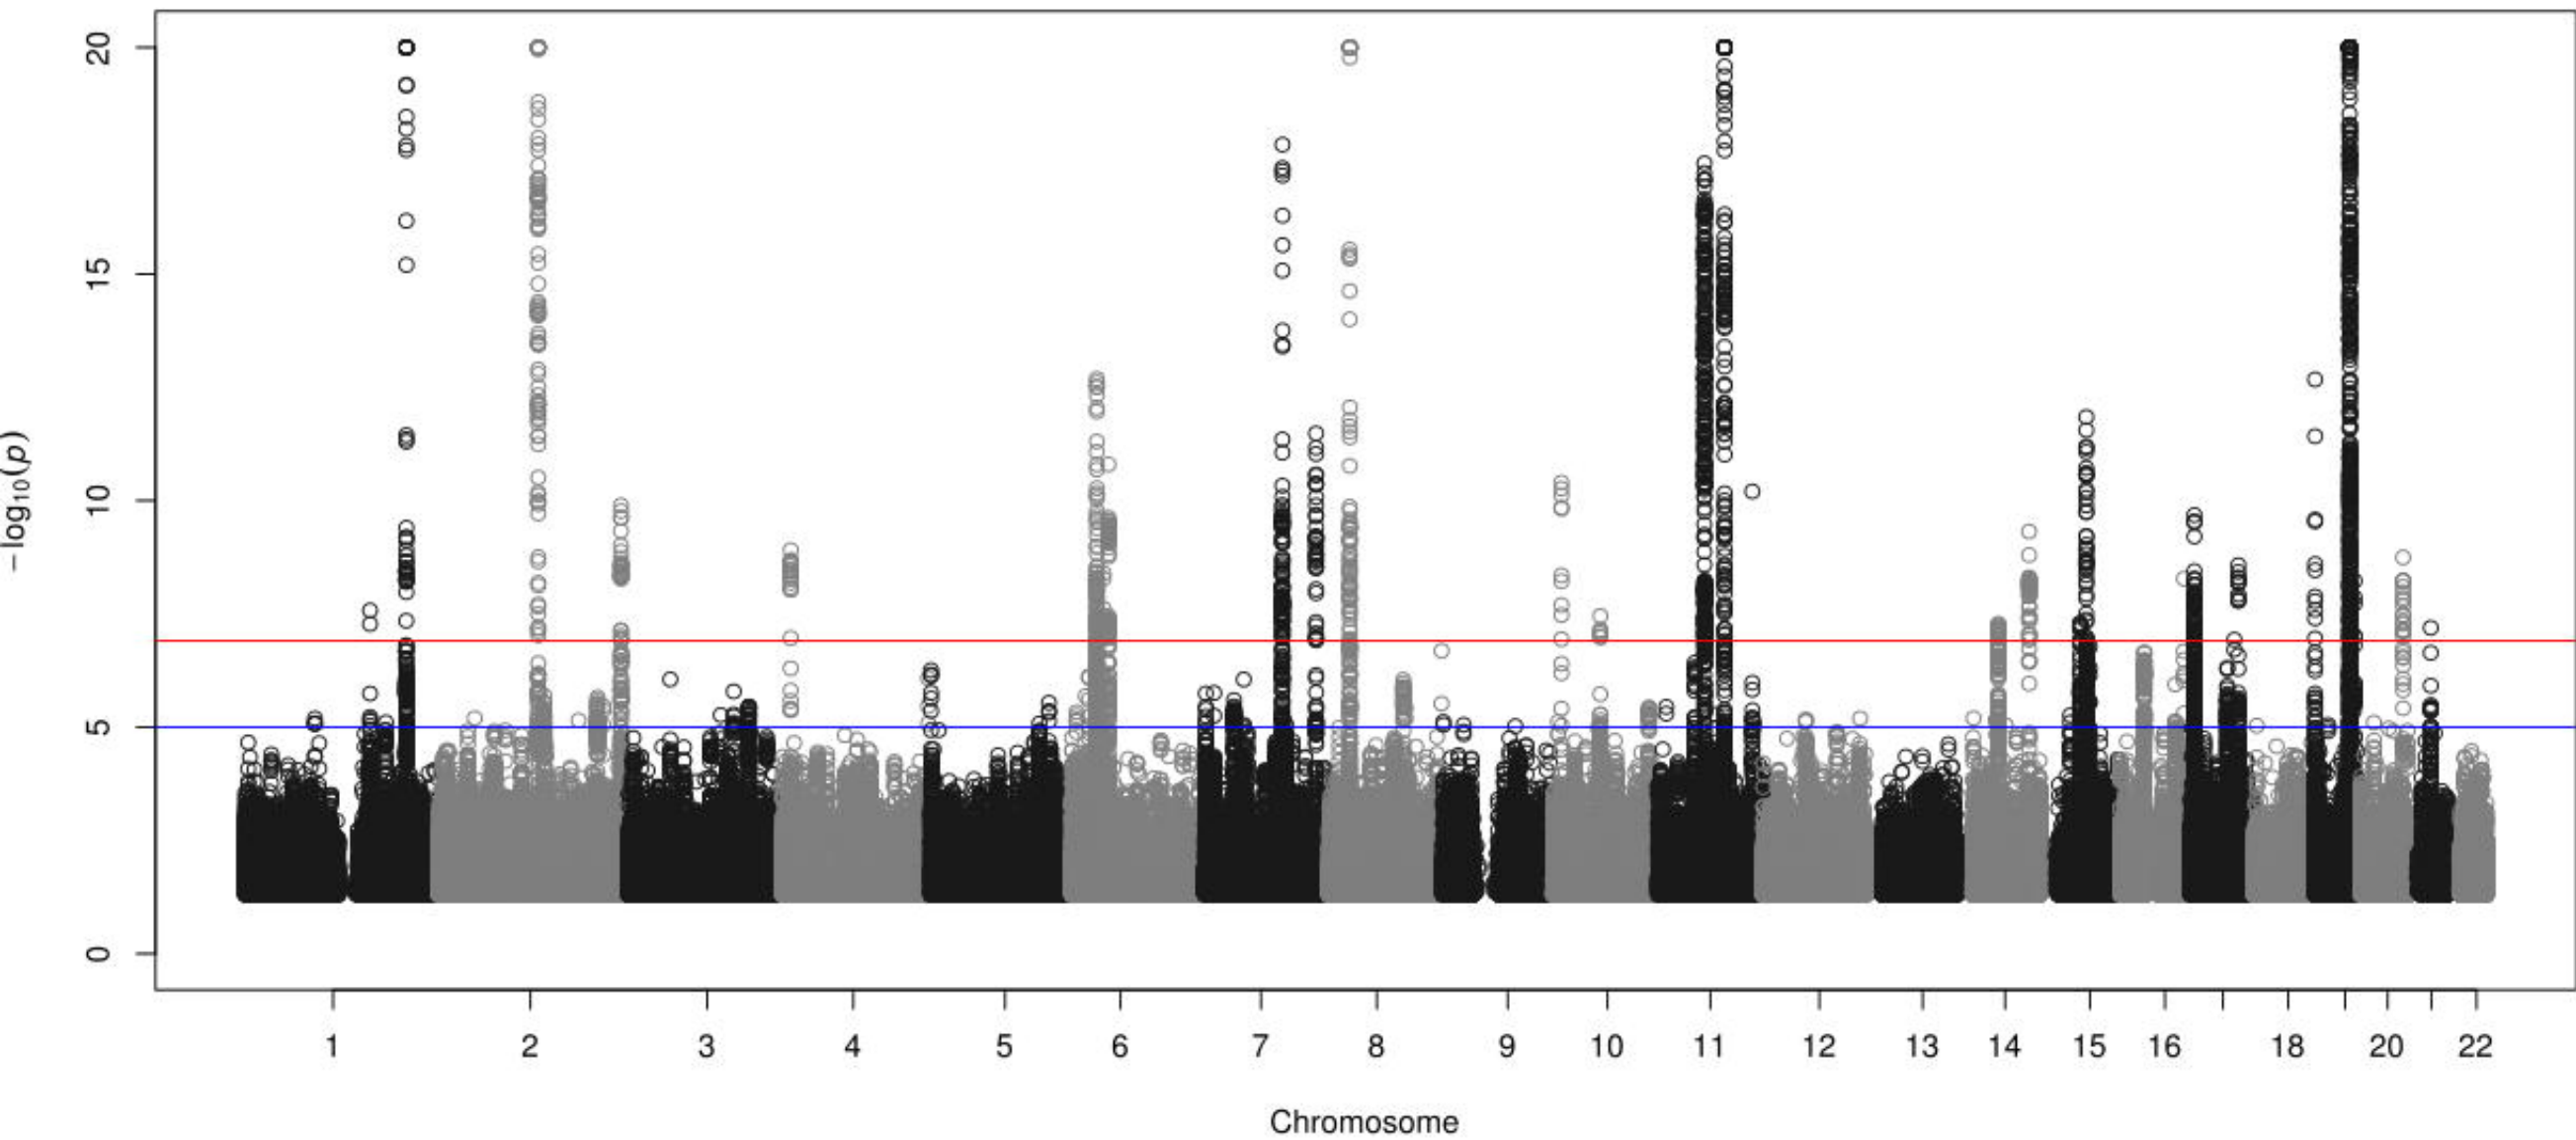

Source: https://www.biorxiv.org/content/10.1101/246223v1.full.pdf
